# Supplementary figures and images for: Self-aligned 3D microlenses in a chip fabricated with two-photon stereolithography for highly sensitive absorbance measurement
Source: Royal Society of Chemistry journal article supplement (doi:10.1039/d0lc00235f), 2020-01-01

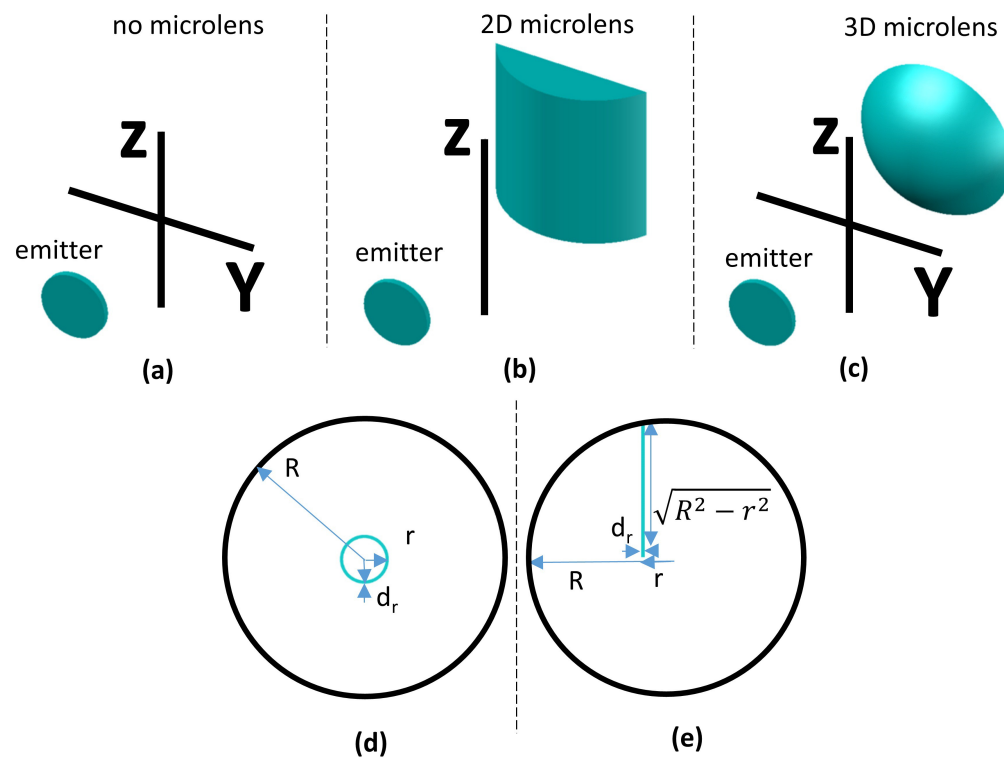

Supplement: d0lc00235f1.pdf [file d0lc00235f1.pdf]
